# Supplementary material
Source: Research Square preprint supplement (doi:10.21203/rs.3.rs-8886674/v1)
Supplement: Supplementary file 1 [file 296407181edf59b66b76849c.docx]

**Supplementary material details**

**SI: DAWBA screening module,** [**dawba.info/py/dawbainfo/b1list.py?language=English**](https://dawba.info/py/dawbainfo/b1list.py?language=English)

**
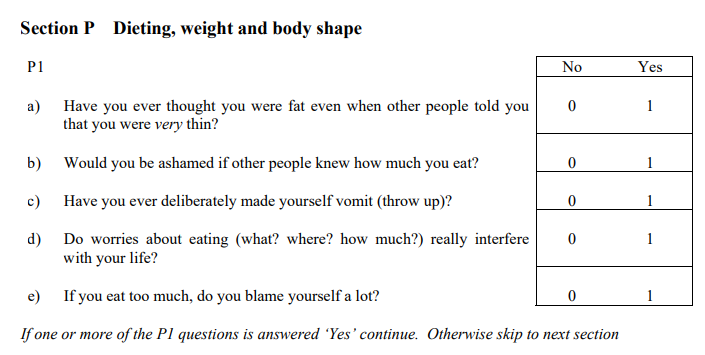
**

**Table SII: help seeking by Ethnicity**

|  | **White** | **Minoritised ethnic background** | **Total** |
| --- | --- | --- | --- |
| No help | 700 | 200 | 900 |
| Informal only | 130 | 20 | 150 |
| Professional | 210 | 30 | 240 |
| Secondary | 130 | *s | 130 |
| Missing | 5 | 0 | 5 |
| Total | **1,160** | **270** | **1,430** |

*s signifies cell count <10. Statistical disclosure guidance has been followed in rounding numbers to 5.

**Table SIII: Help seeking among people screening positive for each DAWBA ED screening module question (weighted row percentages)**

|  | No help % (95% CI) | Informal only % (95% CI) | Formal % (95% CI) | Secondary healthcare % (95% CI) |
| --- | --- | --- | --- | --- |
| Purging | 51.7 (44.5, 58.8) | 9.33 (5.67,15.0) | 23.3 (17.7, 30.0) | 15.7 (11.1, 21.8) |
| Thought fat | 62.2 (59.4, 64.9) | 12.5 (10.6, 14.7) | 17.3 (15.3, 19.5) | 8.07 (6.70, 9.70) |
| Eating worries | 48.2 (42.8, 53.7) | 13.9 (10.2, 18.5) | 22.8 (18.6, 27.6) | 15.2 (11.6, 19.5) |
| Self-blame | 58.7 (54.3, 63.1) | 12.1 (9.34, 15.6) | 18.0 (14.8, 21.6) | 11.2 (8.65, 14.3) |
| Shame | 60.6 (55.7, 65.3) | 9.87 (7.15, 13.5) | 18.9 (15.3, 23.0) | 10.7 (8.08, 14.1) |

Table SIII: Help seeking among people screening positive for each DAWBA ED screening module question

**Table SIV: Proportion of all young people reporting contact with types of services screening positive for possible eating problems (weighted percentages)**

| Source of help or service contact (past year) | No help | Informal only | Formal | Secondary care | Any help | Teacher | Primary care | Physical health specialist | Mental health specialist |
| --- | --- | --- | --- | --- | --- | --- | --- | --- | --- |
| Percentage of young people screening positive (95% CI) | 32.5 (30.7, 34.4) | 46.9 (41.1, 52.7) | 43.5 (39.1, 47.9) | 46.6 (40.5, 52.8) | 45.3 (42.2, 48.4) | 42.7 (38.6, 47.0) | 46.9 (40.9, 53.0) | 32.2 (23.1, 42.9) | 50.0 (43.1, 56.8) |

**Regression model**

**Detailed multinomial regression model diagnostics**

All variables had <1% missingness apart from housing tenure (1.7%). Only one unweighted predictor–outcome cell contained fewer than 10 cases (minoritised ethnic background and secondary healthcare). Predicted probabilities ranged from 0.006 to 0.87 and summed to approximately one, indicating no separation. There was no evidence of collinearity (mean VIF = 1.04; all ≤ 1.10). A joint Wald test was undertaken for housing tenure, the only predictor with more than two categories; this showed no overall effect (F(6, 4007) = 0.68, p = 0.669).

**Model checks**

1. **Missingness of model variables**

**Table SV: Missingness of variables within the possible eating problem subgroup**

|  | **Observation N** | **Missing N** | **Missingness (%)** |
| --- | --- | --- | --- |
| Sex | 4,057 | 0 | 0 |
| Age | 4,057 | 0 | 0 |
| Any DSM diagnosis | 4,057 | 0 | 0 |
| Ethnic group | 4,065 | 1 | 0.02 |
| Type of help | 4,025 | 32 | 0.79 |
| Mental health services | 4,025 | 32 | 0.79 |
| Child health | 4,025 | 32 | 0.79 |
| Primary care | 4,025 | 32 | 0.79 |
| Teacher | 4,025 | 32 | 0.79 |
| Tenure | 3,988 | 69 | 1.7 |

1. **Unweighted cell counts of category of reported help or service contact for each predictor variable with the possible eating problem subgroup, to ensure no cells <10**

**Table SVI: Age**

|  | **11 to 16** | **17 to 19** | **Total** |
| --- | --- | --- | --- |
| No help | 699 | 199 | 898 |
| Informal only | 47 | 102 | 149 |
| Professional | 167 | 73 | 240 |
| Secondary | 82 | 50 | 134 |
| Missing | 2 | 3 | 5 (0.35%) |
| Total | 999 | 427 | 1,426 |

**Table SVII: Sex**

|  | **Male** | **Female** | **Total** |
| --- | --- | --- | --- |
| No help | 335 | 563 | 898 |
| Informal only | 62 | 87 | 149 |
| Professional | 71 | 169 | 240 |
| Secondary | 40 | 94 | 134 |
| Missing | 3 | 2 | 5 (0.35%) |
| Total | 511 | 915 | 1,426 |

**Table SVIII: Tenure**

|  | Owner | Private rented | Social rented | Missing | Total |
| --- | --- | --- | --- | --- | --- |
| No help | 588 | 129 | 263 | 18 | 898 |
| Informal | 83 | 31 | 27 | 8 | 149 |
| Formal | 140 | 41 | 50 | 9 | 240 |
| Secondary care | 83 | 18 | 29 | 4 | 134 |
| Missing | 3 | 0 | 2 | 0 | 5 |
| Total | 897 | 219 |  | 39 | 1,426 |

**Table SIX: DSM-5 comorbidity**

|  | **Not comorbid** | **Comorbid** | **Total** |
| --- | --- | --- | --- |
| No help | 830 | 68 | 898 |
| Informal only | 122 | 27 | 149 |
| Professional | 180 | 60 | 240 |
| Secondary | 66 | 68 | 134 |
| Missing | 5 | 0 | 5 (0.35%) |
| Total | 1,203 | 223 | 1,426 |

1. **Predicted probabilities**

**Table SX: Predicted probabilities**

|  | **Obs** | **Mean** | **Std. dev** | **Min** | **Max** |
| --- | --- | --- | --- | --- | --- |
| pr1 | 3,987 | 0.679 | 0.181 | 0.188 | 0.872 |
| pr2 | 3,987 | 0.098 | 0.098 | 0.029 | 0.407 |
| pr3 | 3,987 | 0.153 | 0.057 | 0.079 | 0.322 |
| pr4 | 3,987 | 0.070 | 0.100 | 0.006 | 0.412 |

Predicted probabilities ranged between 0.006 and 0.87 across outcome categories, and sum of means ~1, which suggests no evidence of separation or extreme predictions.

1. **Testing for collinearity – VIF**

**Table SXI: Variance Inflation factors**

|  | **VIF** | **1/VIF** |
| --- | --- | --- |
| Age group (17 to 19) | 1.01 | 0.99 |
| Sex (female) | 1.00 | 1.00 |
| Private rented | 1.07 | 0.94 |
| Social rented | 1.10 | 0.91 |
| Ethnicity (minoritised ethnic background) | 1.04 | 0.96 |
| DSM5 comorbidity (DSM5 comorbidity present) | 1.04 | 0.96 |
| **Mean VIF** | **1.04** |  |

1. **Joint test (Adjusted Wald test)**

**Table SXII: Joint test (Adjusted Wald test)**

|  | **Joint test (df)** | **F** | **p-value** |
| --- | --- | --- | --- |
| Housing tenure | F(6,4007) | 0.68 | 0.6687 |

Housing tenure was the only categorical predictor variable with more than two categories included in the model. When assessing for overall effect, it was not significantly associated with type of reported service contact (joint Wald test, F(6,4007) = 0.68, p(0.6687)

1. **Variables with large RRR and CI: sensitivity models rerunning model with binary categories of reported service contact (any help vs non; Secondary healthcare vs all other categories).**

**Table SXIII: Sensitivity models for DSM-5 comorbidities**

|  | RRR | P value | 95% CI |  |  |
| --- | --- | --- | --- | --- | --- |
| Any help vs no help | 4.96 | 0.000 | 3.60 to 6.82 |  |  |
| Secondary healthcare vs no secondary healthcare | 13.3 | 0.000 | 8.19 to 21.6 |  |  |

In sensitivity analyses, when using binary categories of reported service contact (any help vs none; secondary healthcare vs all other categories), DSM-5 comorbidity remained strongly and significantly associated with reported service contact

1. **With and without any variable with high rates of missingness – N/A**

**Observations included in the model and how missing data was treated**

Of 4,057 participants aged 11 to 19, 1,426 screened positive for a possible eating problem. The regression model included 4,013 individuals overall (Table SXIV), 1,382 within the possible eating problem subpopulation, and 2631 outside it (Table SXIV). 44 individuals with a possible eating problem were excluded from the model due to missing data on predictor variables (Table SXV). An additional 57 individuals without a possible eating problem had missing data on predictor variables but were retained for variance calculations (Table SXIV), as per Stata’s svy prefix and subpopulation estimation procedures(1). Number of observations in the model and weighted population size estimates are displayed in Table SXVI.

**Table SXIV: Missing model variables and screening status, within the model sample**

|  | **Not missing** | **Missing** | **Total** |
| --- | --- | --- | --- |
| Screen negative | 2,574 | 57 | 2631 |
| Screen positive | 1,382 | 0 | 1382 |
| Total | 3,956 | 57 | 4,013 |

**Table SXV: Missing model variables and screening status, within the whole cohort**

|  | **Not missing** | **Missing** | **Total** |
| --- | --- | --- | --- |
| Screen negative | 2,574 | 57 | 2,631 |
| Screen positive | 1,382 | 44 | 1,426 |
| Total | 3,956 | 101 | 4,057 |

**Table SXVI: Model observation size and weighted population size estimates**

| **Group** | **N** |
| --- | --- |
| Number of observations | 4,013 |
| Population size | 5,502,275 |
| Subpopulation observations | 1,382 |
| Subpopulation size | 1,946,332 |

1. svysubpopulationestimation.pdf [Internet]. [cited 2025 Nov 3]. Available from: https://www.stata.com/manuals13/svysubpopulationestimation.pdf
